# Supplementary material for: Understanding the role of carboxylic acid surfactants in the growth inhibition effect during area-selective atomic layer deposition: the case of ZnO growth on Cu and Cu2O
Source: Royal Society of Chemistry journal article supplement (doi:10.1039/d4cp03117b), 2024-01-01
Supplement: d4cp03117b1.pdf [file d4cp03117b1.pdf]

## Supporting Information

*Understanding the role of carboxylic acid surfactants growth inhibition effect in the area selective atomic layer deposition: The case of ZnO growth on Cu and Cu<sub>2</sub>O*

L. E. López-González<sup>1\*</sup>, R. Ponce-Pérez<sup>1</sup>, H. Tiznado<sup>1\*</sup>, J. Guerrero-Sánchez<sup>1\*</sup>

<sup>1</sup>*Centro de Nanociencias y Nanotecnología, Universidad Nacional Autónoma de México, Ensenada, BC 22860, Mex.*

## Figure captions

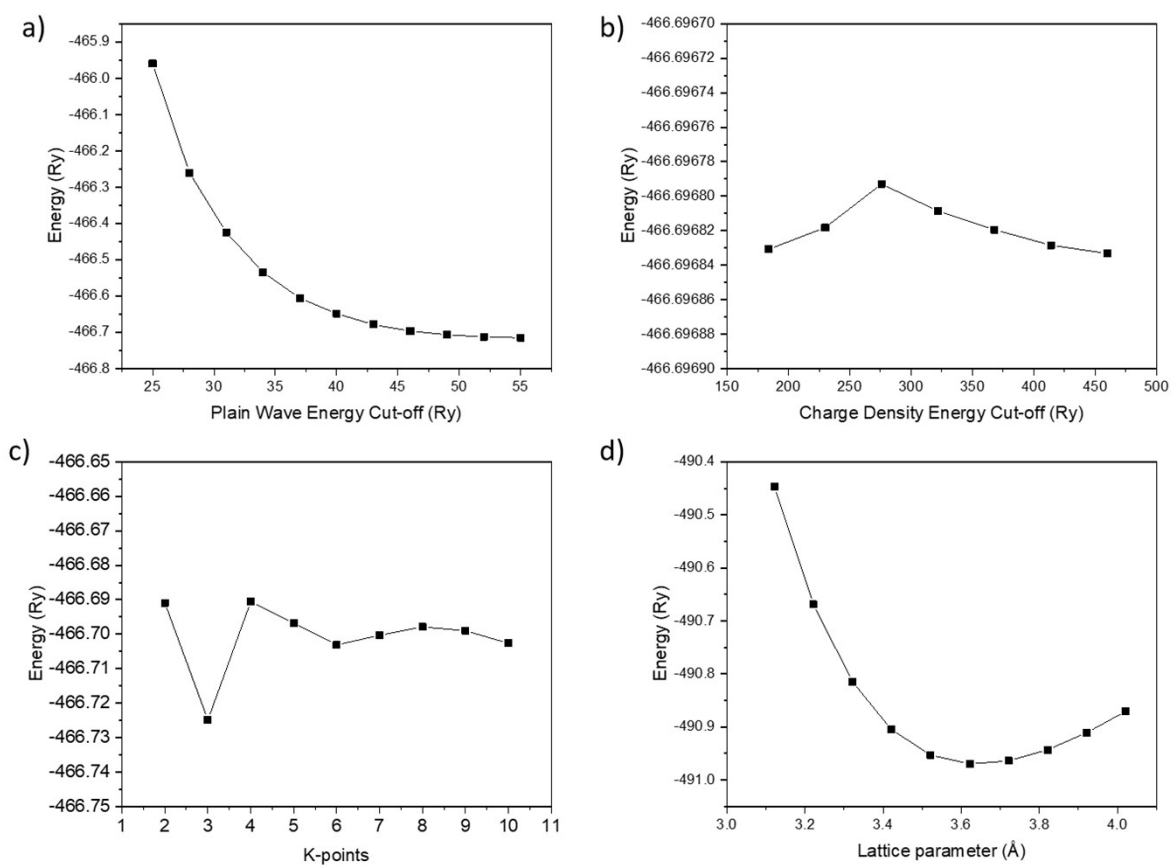

**Figure S1.** Optimization of computational parameters for bulk Copper. The total energy of the system as a function of (a) plain wave energy cut-off, (b) charge density energy cut-off, (c) k-points, (d) lattice parameter.

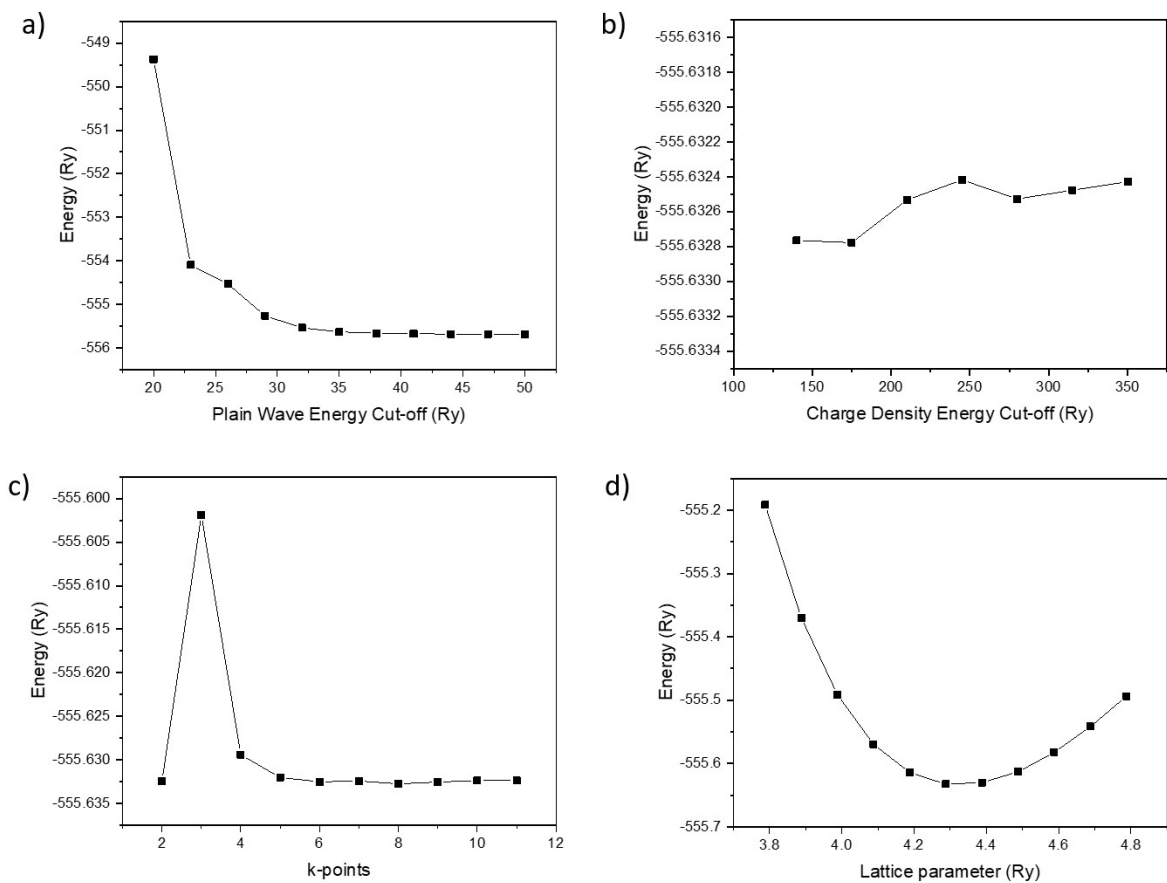

**Figure S2.** Optimization of computational parameters for bulk  $\text{Cu}_2\text{O}$ . The total energy of the system as a function of (a) plain wave energy cut-off, (b) charge density energy cut-off, (c) k-points, (d) lattice parameter.

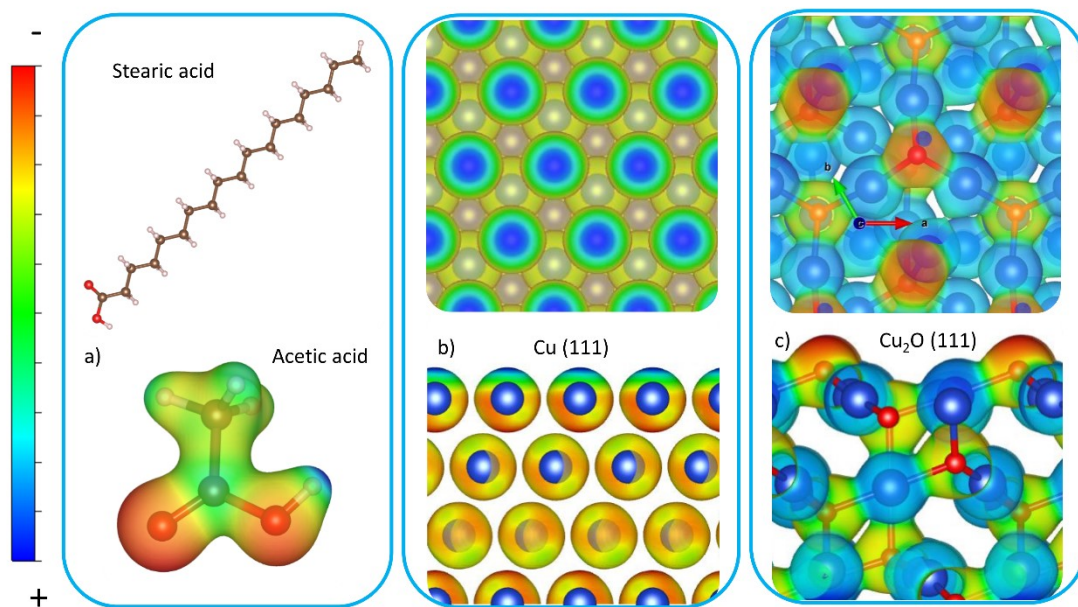

**Figure S3.** Charge density isosurfaces colored by electrostatic potential for a) acetic acid (AA), b) copper (111) surface top and side views, c) cuprous oxide (111) surface top and side views. Color scale indicates a positive electrostatic potential as blue and a negative one as red. Atom color code: Cu (blue), O (red), C (brown), H (white).

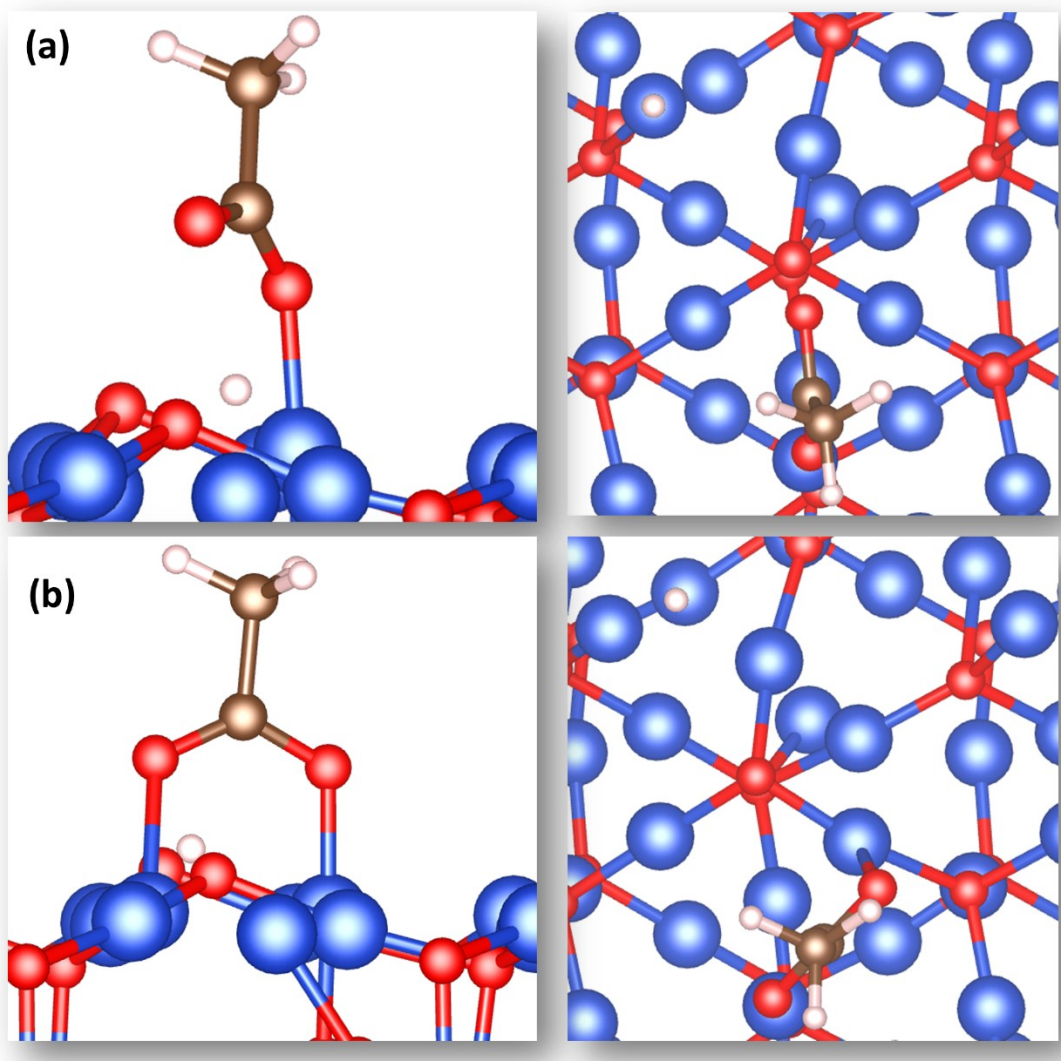

**Figure S4.** (a) Initial geometry in a monodentate manner (dissociative chemisorption binding with one COO oxygen to CUS Cu atom and H adsorbed to the surface) prior to relaxation, (b) optimized geometry (after relaxation) of (a) yielding spontaneous bidentate adsorption configuration.

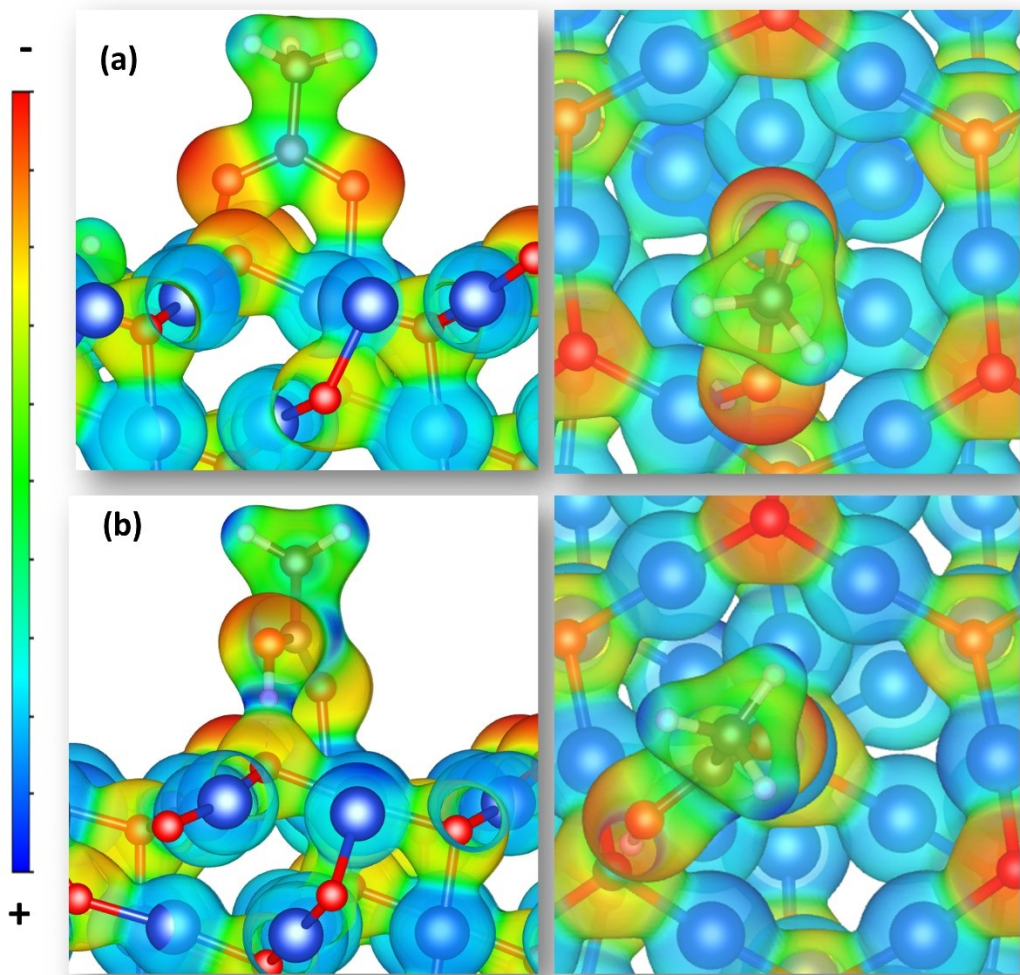

**Figure S5.** Charge density isosurfaces colored by the electrostatic potential for the most stable (most negative  $E_{\text{ads}}$ ) configurations (carbonyl chemisorbed and bidentate) of AA adsorbed on Cu<sub>2</sub>O (111).

**Table S1.** Bond lengths and angles for the acetic acid molecule in vacuum and adsorbed (each most stable obtained adsorption model).

| Chemical species             | Bond | Length (Å) | Angle    | Length (°) |
|------------------------------|------|------------|----------|------------|
| Free<br>CH <sub>3</sub> COOH | C-C  | 1.51       | C2-O1-H1 | 110.22     |
|                              | C-O  | 1.37       | H2-C1-H3 | 109.09     |
|                              | C=O  | 1.21       | C2-C1-H2 | 110.69     |
|                              | C-H  | 1.10       | H2-C1-H4 | 107.70     |
|                              | C-H  | 1.10       | C2-C1-H3 | 109.54     |
|                              | C-H  | 1.10       | H3-C1-H4 | 109.08     |
|                              | O-H  | 0.97       | C2-C1-H4 | 110.70     |
|                              |      |            | O2-C2-C1 | 125.14     |
|                              |      |            | O1-C2-C1 | 115.43     |
|                              |      |            | O1-C2-O2 | 119.43     |
| Carbonyl chemisorbed AA      |      |            |          |            |
| Cu (b)                       | C-C  | 1.50       | C2-O1-H1 | 109.37     |
|                              | C-O  | 1.36       | H2-C1-H3 | 108.54     |
|                              | C=O  | 1.22       | C2-C1-H2 | 110.34     |
|                              | C-H  | 1.10       | H2-C1-H4 | 108.54     |
|                              | C-H  | 1.10       | C2-C1-H3 | 109.85     |
|                              | C-H  | 1.10       | H3-C1-H4 | 108.68     |
|                              | O-H  | 0.97       | C2-C1-H4 | 110.80     |
|                              |      |            | O2-C2-C1 | 126.37     |
|                              |      |            | O1-C2-C1 | 116.10     |
|                              |      |            | O1-C2-O2 | 117.52     |
| Cu (c)                       | C-C  | 1.50       | C2-O1-H1 | 110.84     |
|                              | C-O  | 1.37       | H2-C1-H3 | 108.74     |
|                              | C=O  | 1.22       | C2-C1-H2 | 112.20     |
|                              | C-H  | 1.10       | H2-C1-H4 | 110.14     |
|                              | C-H  | 1.10       | C2-C1-H3 | 112.20     |
|                              | C-H  | 1.09       | H3-C1-H4 | 107.41     |
|                              | O-H  | 0.98       | C2-C1-H4 | 109.82     |
|                              |      |            | O2-C2-C1 | 125.44     |
|                              |      |            | O1-C2-C1 | 115.86     |
|                              |      |            | O1-C2-O2 | 118.65     |
| Cu (d)                       | C-C  | 1.50       | C2-O1-H1 | 112.56     |
|                              | C-O  | 1.37       | H2-C1-H3 | 107.67     |
|                              | C=O  | 1.21       | C2-C1-H2 | 110.13     |
|                              | C-H  | 1.10       | H2-C1-H4 | 109.43     |
|                              | C-H  | 1.10       | C2-C1-H3 | 109.54     |
|                              | C-H  | 1.10       | H3-C1-H4 | 109.51     |
|                              | O-H  | 0.98       | C2-C1-H4 | 110.50     |
|                              |      |            | O2-C2-C1 | 125.34     |
|                              |      |            | O1-C2-C1 | 115.42     |
|                              |      |            | O1-C2-O2 | 119.23     |
| Cu <sub>2</sub> O (a)        | C-C  | 1.50       | C2-O1-H1 | 108.70     |
|                              | C-O  | 1.33       | H2-C1-H3 | 107.19     |
|                              | C=O  | 1.24       | C2-C1-H2 | 109.88     |
|                              | C-H  | 1.10       | H2-C1-H4 | 109.43     |
|                              | C-H  | 1.10       | C2-C1-H3 | 109.21     |
|                              | C-H  | 1.09       | H3-C1-H4 | 107.19     |

|                             |     |      |          |        |
|-----------------------------|-----|------|----------|--------|
|                             | O-H | 1.04 | C2-C1-H4 | 109.21 |
|                             |     |      | O2-C2-C1 | 122.34 |
|                             |     |      | O1-C2-C1 | 114.22 |
|                             |     |      | O1-C2-O2 | 123.43 |
| <u>Cu<sub>2</sub>O (b)</u>  | C-C | 1.49 | C2-O1-H1 | 109.16 |
|                             | C-O | 1.32 | H2-C1-H3 | 108.98 |
|                             | C=O | 1.25 | C2-C1-H2 | 109.65 |
|                             | C-H | 1.10 | H2-C1-H4 | 111.04 |
|                             | C-H | 1.10 | C2-C1-H3 | 108.96 |
|                             | C-H | 1.09 | H3-C1-H4 | 107.80 |
|                             | O-H | 1.00 | C2-C1-H4 | 110.34 |
|                             |     |      | O2-C2-C1 | 121.37 |
|                             |     |      | O1-C2-C1 | 114.40 |
|                             |     |      | O1-C2-O2 | 123.43 |
| <u>Cu<sub>2</sub>O (c)</u>  | C-C | 1.50 | C2-O1-H1 | 116.63 |
|                             | C-O | 1.30 | H2-C1-H3 | 110.15 |
|                             | C=O | 1.26 | C2-C1-H2 | 110.67 |
|                             | C-H | 1.10 | H2-C1-H4 | 110.24 |
|                             | C-H | 1.10 | C2-C1-H3 | 109.35 |
|                             | C-H | 1.10 | H3-C1-H4 | 106.95 |
|                             | O-H | 1.09 | C2-C1-H4 | 109.37 |
|                             |     |      | O2-C2-C1 | 118.75 |
|                             |     |      | O1-C2-C1 | 114.74 |
|                             |     |      | O1-C2-O2 | 126.43 |
| <b>Bidentate adsorption</b> |     |      |          |        |
| <u>Cu (a)</u>               | C-C | 1.51 | O1-C1-O2 | 125.60 |
|                             | C-O | 1.28 | O2-C1-C2 | 116.73 |
|                             | C-O | 1.28 | O1-C1-C2 | 117.64 |
|                             | C-H | 1.10 | H2-C2-H3 | 108.34 |
|                             | C-H | 1.10 | C1-C2-H3 | 111.12 |
|                             | C-H | 1.09 | H1-C2-H3 | 110.11 |
|                             |     |      | C1-C2-H2 | 108.98 |
|                             |     |      | H1-C2-H2 | 107.33 |
|                             |     |      | C1-C2-H1 | 110.82 |
| <u>Cu<sub>2</sub>O (d)</u>  | C-C | 1.51 | O1-C1-O2 | 124.67 |
|                             | C-O | 1.30 | O2-C1-C2 | 115.61 |
|                             | C-O | 1.26 | O1-C1-C2 | 119.69 |
|                             | C-H | 1.10 | H2-C2-H3 | 107.83 |
|                             | C-H | 1.09 | C1-C2-H3 | 111.16 |
|                             | C-H | 1.09 | H1-C2-H3 | 110.33 |
|                             |     |      | C1-C2-H2 | 108.37 |
|                             |     |      | H1-C2-H2 | 107.90 |
|                             |     |      | C1-C2-H1 | 111.10 |
| <u>Cu<sub>2</sub>O (e)</u>  | C-C | 1.51 | O1-C1-O2 | 124.67 |
|                             | C-O | 1.30 | O2-C1-C2 | 115.61 |
|                             | C-O | 1.26 | O1-C1-C2 | 119.70 |
|                             | C-H | 1.10 | H2-C2-H3 | 107.83 |
|                             | C-H | 1.09 | C1-C2-H3 | 111.16 |
|                             | C-H | 1.09 | H1-C2-H3 | 110.35 |
|                             |     |      | C1-C2-H2 | 108.37 |
|                             |     |      | H1-C2-H2 | 107.90 |
|                             |     |      | C1-C2-H1 | 111.10 |



**Table S2.** The vibrational frequencies of the acetic acid molecule for each obtained stable adsorption model (last two models include vibrational frequencies corresponding to DEZ molecule).

| Model     |           | Cu- AA (a) $E_{\text{ads}}=-2.08$ eV             |            |           | Model     |           | Cu- AA (c) $E_{\text{ads}}=-0.23$ eV             |  |  |
|-----------|-----------|--------------------------------------------------|------------|-----------|-----------|-----------|--------------------------------------------------|--|--|
| Frequency | THz       | $cm^{-1}$                                        | meV        | Frequency | THz       | $cm^{-1}$ | meV                                              |  |  |
| 1         | 93.63577  | 3123.353                                         | 387.2462   | 1         | 110.9866  | 3702.114  | 459.0035                                         |  |  |
| 2         | 92.35676  | 3080.69                                          | 381.9567   | 2         | 93.45961  | 3117.477  | 386.5177                                         |  |  |
| 3         | 90.1771   | 3007.984                                         | 372.9423   | 3         | 91.84475  | 3063.611  | 379.8392                                         |  |  |
| 4         | 44.92466  | 1498.525                                         | 185.7934   | 4         | 89.88186  | 2998.136  | 371.7213                                         |  |  |
| 5         | 42.85611  | 1429.526                                         | 177.2385   | 5         | 53.72067  | 1791.929  | 222.1707                                         |  |  |
| 6         | 42.31338  | 1411.423                                         | 174.994    | 6         | 43.07634  | 1436.872  | 178.1493                                         |  |  |
| 7         | 41.28326  | 1377.061                                         | 170.7338   | 7         | 42.57201  | 1420.049  | 176.0636                                         |  |  |
| 8         | 39.84969  | 1329.243                                         | 164.805    | 8         | 40.19848  | 1340.877  | 166.2475                                         |  |  |
| 9         | 32.43058  | 1081.768                                         | 134.1221   | 9         | 36.93709  | 1232.089  | 152.7595                                         |  |  |
| 10        | 30.41438  | 1014.515                                         | 125.7837   | 10        | 34.71216  | 1157.873  | 143.5579                                         |  |  |
| 11        | 29.90211  | 997.4269                                         | 123.6651   | 11        | 30.35767  | 1012.623  | 125.5492                                         |  |  |
| 12        | 27.92085  | 931.3392                                         | 115.4713   | 12        | 28.53168  | 951.7144  | 117.9975                                         |  |  |
| 13        | 26.15271  | 872.3604                                         | 108.1589   | 13        | 25.04442  | 835.3918  | 103.5753                                         |  |  |
| 14        | 24.12593  | 804.7544                                         | 99.77678   | 14        | 17.42751  | 581.3191  | 72.07435                                         |  |  |
| 15        | 19.60588  | 653.9818                                         | 81.08337   | 15        | 17.05827  | 569.0025  | 70.54728                                         |  |  |
| 16        | 17.56589  | 585.9351                                         | 72.64667   | 16        | 13.84059  | 461.6724  | 57.24005                                         |  |  |
| 17        | 14.94088  | 498.374                                          | 61.79047   | 17        | 12.5206   | 417.6421  | 51.781                                           |  |  |
| 18        | 7.208008  | 240.4333                                         | 29.80991   | 18        | 1.283434  | 42.81077  | 5.307856                                         |  |  |
| 19        | 5.919126  | 197.4408                                         | 24.47953   | 19        | 0.757782  | 25.27689  | 3.133933                                         |  |  |
| 20        | 3.956991  | 131.991                                          | 16.36479   | 20        | 0.645444  | 21.52968  | 2.669339                                         |  |  |
| 21        | 3.035792  | 101.2631                                         | 12.55502   |           |           |           |                                                  |  |  |
| 22        | 2.77943   | 92.71182                                         | 11.4948    |           |           |           |                                                  |  |  |
| 23        | 1.66897   | 55.67085                                         | 6.902303   |           |           |           |                                                  |  |  |
| Model     |           | Cu <sub>2</sub> O- AA (d) $E_{\text{ads}}=-2.33$ |            |           | Model     |           | Cu <sub>2</sub> O- AA (e) $E_{\text{ads}}=-2.45$ |  |  |
| Frequency | THz       | $cm^{-1}$                                        | meV        | Frequency | THz       | $cm^{-1}$ | meV                                              |  |  |
| 1         | 90.442609 | 3016.8407                                        | 374.040407 | 1         | 90.298434 | 3012.032  | 373.4441                                         |  |  |
| 2         | 89.333763 | 2979.854                                         | 369.454593 | 2         | 89.194986 | 2975.224  | 368.8807                                         |  |  |
| 3         | 86.877601 | 2897.925                                         | 359.296724 | 3         | 86.83427  | 2896.479  | 359.1175                                         |  |  |
| 4         | 53.15898  | 1773.193                                         | 219.847779 | 4         | 51.701821 | 1724.587  | 213.8215                                         |  |  |
| 5         | 42.863021 | 1429.756                                         | 177.267132 | 5         | 42.888787 | 1430.616  | 177.3737                                         |  |  |
| 6         | 42.226381 | 1408.52                                          | 174.634202 | 6         | 42.199647 | 1407.629  | 174.5236                                         |  |  |
| 7         | 41.653756 | 1389.42                                          | 172.266017 | 7         | 41.579384 | 1386.939  | 171.9584                                         |  |  |
| 8         | 39.549899 | 1319.243                                         | 163.565166 | 8         | 39.520129 | 1318.25   | 163.442                                          |  |  |
| 9         | 38.100454 | 1270.894                                         | 157.570747 | 9         | 38.239191 | 1275.522  | 158.1445                                         |  |  |
| 10        | 29.768757 | 992.9789                                         | 123.113632 | 10        | 29.673362 | 989.7968  | 122.7191                                         |  |  |
| 11        | 28.993238 | 967.1103                                         | 119.906344 | 11        | 29.084959 | 970.1698  | 120.2857                                         |  |  |
| 12        | 26.859266 | 895.9287                                         | 111.080948 | 12        | 27.013062 | 901.0588  | 111.717                                          |  |  |
| 13        | 19.478339 | 649.7275                                         | 80.555903  | 13        | 19.489468 | 650.0987  | 80.60193                                         |  |  |
| 14        | 16.995934 | 566.9233                                         | 70.289503  | 14        | 17.872072 | 596.1482  | 73.91292                                         |  |  |

|                                                             |           |                  |           |                                                             |           |                  |          |
|-------------------------------------------------------------|-----------|------------------|-----------|-------------------------------------------------------------|-----------|------------------|----------|
| 15                                                          | 16.91894  | 564.3551         | 69.971083 | 15                                                          | 16.798863 | 560.3498         | 69.47448 |
| 16                                                          | 14.566408 | 485.8831         | 60.241796 | 16                                                          | 14.739343 | 491.6516         | 60.957   |
| 17                                                          | 11.821705 | 394.3296         | 48.890623 | 17                                                          | 12.006832 | 400.5048         | 49.65624 |
| 18                                                          | 6.948245  | 231.7685         | 28.735621 | 18                                                          | 8.239406  | 274.837          | 34.07543 |
| 19                                                          | 4.287824  | 143.0264         | 17.733008 | 19                                                          | 4.191201  | 139.8034         | 17.33341 |
| 20                                                          | 4.079715  | 136.0846         | 16.872336 | 20                                                          | 3.529914  | 117.7452         | 14.59854 |
| 21                                                          | 2.44902   | 81.69052         | 10.128329 | 21                                                          | 2.401854  | 80.11722         | 9.933265 |
| Model Cu <sub>2</sub> O- AA (a) E <sub>ads</sub> = -3.44 eV |           |                  |           | Model Cu <sub>2</sub> O- AA (b) E <sub>ads</sub> = -3.04 eV |           |                  |          |
| Frequency                                                   | THz       | cm <sup>-1</sup> | meV       | Frequency                                                   | THz       | cm <sup>-1</sup> | meV      |
| 1                                                           | 93.73462  | 3126.6503        | 387.6551  | 1                                                           | 90.92049  | 3032.781         | 376.0168 |
| 2                                                           | 92.16675  | 3074.352         | 381.1709  | 2                                                           | 90.19185  | 3008.476         | 373.0034 |
| 3                                                           | 90.15853  | 3007.365         | 372.8655  | 3                                                           | 87.46195  | 2917.416         | 361.7134 |
| 4                                                           | 50.87224  | 1696.915         | 210.3906  | 4                                                           | 86.79026  | 2895.012         | 358.9355 |
| 5                                                           | 43.85159  | 1462.731         | 181.3555  | 5                                                           | 46.89696  | 1564.314         | 193.9502 |
| 6                                                           | 42.74506  | 1425.822         | 176.7793  | 6                                                           | 42.2539   | 1409.438         | 174.748  |
| 7                                                           | 42.67633  | 1423.529         | 176.495   | 7                                                           | 41.81762  | 1394.886         | 172.9437 |
| 8                                                           | 41.84322  | 1395.739         | 173.0496  | 8                                                           | 40.70582  | 1357.8           | 168.3457 |
| 9                                                           | 40.00056  | 1334.275         | 165.429   | 9                                                           | 38.97095  | 1299.931         | 161.1708 |
| 10                                                          | 37.24331  | 1242.303         | 154.0259  | 10                                                          | 35.59723  | 1187.396         | 147.2182 |
| 11                                                          | 35.90921  | 1197.802         | 148.5085  | 11                                                          | 29.83246  | 995.1038         | 123.3771 |
| 12                                                          | 30.55648  | 1019.254         | 126.3714  | 12                                                          | 28.98247  | 966.751          | 119.8618 |
| 13                                                          | 30.08757  | 1003.613         | 124.4321  | 13                                                          | 26.31794  | 877.872          | 108.8422 |
| 14                                                          | 27.18113  | 906.6649         | 112.4121  | 14                                                          | 20.56648  | 686.0239         | 85.05608 |
| 15                                                          | 18.69198  | 623.4973         | 77.30378  | 15                                                          | 17.72769  | 591.332          | 73.31579 |
| 16                                                          | 17.59437  | 586.885          | 72.76443  | 16                                                          | 15.60325  | 520.4684         | 64.52983 |
| 17                                                          | 14.50579  | 483.8612         | 59.99111  | 17                                                          | 13.92641  | 464.5352         | 57.595   |
| 18                                                          | 6.600782  | 220.1784         | 27.29863  | 18                                                          | 6.933456  | 231.2752         | 28.67446 |
| 19                                                          | 5.584956  | 186.2941         | 23.09751  | 19                                                          | 4.385572  | 146.2869         | 18.13726 |
| 20                                                          | 4.194962  | 139.9289         | 17.34896  | 20                                                          | 2.915636  | 97.25516         | 12.0581  |
| 21                                                          | 2.710122  | 90.39993         | 11.20816  | 21                                                          | 1.132998  | 37.79276         | 4.685703 |
| 22                                                          | 2.52918   | 84.36437         | 10.45984  |                                                             |           |                  |          |
| 23                                                          | 1.511367  | 50.41379         | 6.25051   |                                                             |           |                  |          |
| Model Cu <sub>2</sub> O-AA-DEZ (a)                          |           |                  |           | Model Cu <sub>2</sub> O-AA-DEZ (b)                          |           |                  |          |
| Frequency                                                   | THz       | cm <sup>-1</sup> | meV       | Frequency                                                   | THz       | cm <sup>-1</sup> | meV      |
| 1                                                           | 93.76896  | 3127.796         | 387.7971  | 1                                                           | 93.40567  | 3115.678         | 386.2946 |
| 2                                                           | 92.38959  | 3081.785         | 382.0925  | 2                                                           | 92.23185  | 3076.523         | 381.4401 |
| 3                                                           | 91.17279  | 3041.197         | 377.0602  | 3                                                           | 91.77102  | 3061.152         | 379.5343 |
| 4                                                           | 91.03838  | 3036.713         | 376.5043  | 4                                                           | 91.74319  | 3060.223         | 379.4192 |
| 5                                                           | 90.55262  | 3020.51          | 374.4954  | 5                                                           | 91.0903   | 3038.445         | 376.719  |
| 6                                                           | 90.4796   | 3018.074         | 374.1934  | 6                                                           | 90.9259   | 3032.962         | 376.0392 |
| 7                                                           | 90.0233   | 3002.854         | 372.3063  | 7                                                           | 90.35604  | 3013.953         | 373.6824 |
| 8                                                           | 88.70865  | 2959.002         | 366.8693  | 8                                                           | 89.84365  | 2996.861         | 371.5633 |

|    |          |          |          |    |          |          |          |
|----|----------|----------|----------|----|----------|----------|----------|
| 9  | 88.65058 | 2957.065 | 366.6292 | 9  | 89.03369 | 2969.844 | 368.2136 |
| 10 | 88.58173 | 2954.769 | 366.3444 | 10 | 88.96335 | 2967.498 | 367.9227 |
| 11 | 87.76319 | 2927.465 | 362.9592 | 11 | 88.57513 | 2954.548 | 366.3171 |
| 12 | 82.16687 | 2740.792 | 339.8147 | 12 | 87.15652 | 2907.229 | 360.4502 |
| 13 | 78.70082 | 2625.177 | 325.4803 | 13 | 86.72939 | 2892.981 | 358.6838 |
| 14 | 56.00578 | 1868.152 | 231.6212 | 14 | 50.37408 | 1680.298 | 208.3304 |
| 15 | 45.4459  | 1515.912 | 187.9491 | 15 | 45.20946 | 1508.025 | 186.9712 |
| 16 | 45.37235 | 1513.459 | 187.6449 | 16 | 43.54186 | 1452.4   | 180.0746 |
| 17 | 43.79807 | 1460.946 | 181.1342 | 17 | 43.45318 | 1449.442 | 179.7078 |
| 18 | 43.60238 | 1454.419 | 180.3249 | 18 | 43.32666 | 1445.222 | 179.1846 |
| 19 | 43.41291 | 1448.099 | 179.5413 | 19 | 43.25771 | 1442.922 | 178.8994 |
| 20 | 42.54689 | 1419.211 | 175.9597 | 20 | 43.08225 | 1437.069 | 178.1738 |
| 21 | 42.48369 | 1417.103 | 175.6983 | 21 | 42.24978 | 1409.301 | 174.731  |
| 22 | 42.11331 | 1404.749 | 174.1666 | 22 | 42.12284 | 1405.067 | 174.206  |
| 23 | 42.01014 | 1401.307 | 173.7399 | 23 | 41.79069 | 1393.987 | 172.8323 |
| 24 | 41.9058  | 1397.827 | 173.3084 | 24 | 41.27889 | 1376.916 | 170.7157 |
| 25 | 40.70031 | 1357.616 | 168.3229 | 25 | 40.85443 | 1362.757 | 168.9603 |
| 26 | 40.01891 | 1334.887 | 165.5048 | 26 | 40.38811 | 1347.202 | 167.0317 |
| 27 | 38.90299 | 1297.664 | 160.8898 | 27 | 39.78934 | 1327.229 | 164.5554 |
| 28 | 38.32636 | 1278.43  | 158.505  | 28 | 36.1128  | 1204.593 | 149.3505 |
| 29 | 36.25184 | 1209.231 | 149.9255 | 29 | 35.62945 | 1188.471 | 147.3515 |
| 30 | 34.94798 | 1165.739 | 144.5332 | 30 | 34.40771 | 1147.718 | 142.2988 |
| 31 | 34.89099 | 1163.838 | 144.2975 | 31 | 34.10062 | 1137.474 | 141.0288 |
| 32 | 34.60606 | 1154.334 | 143.1191 | 32 | 30.41169 | 1014.425 | 125.7726 |
| 33 | 33.98285 | 1133.546 | 140.5417 | 33 | 30.05314 | 1002.465 | 124.2898 |
| 34 | 30.49559 | 1017.223 | 126.1196 | 34 | 29.97857 | 999.9776 | 123.9814 |
| 35 | 30.39111 | 1013.738 | 125.6875 | 35 | 29.94958 | 999.0104 | 123.8615 |
| 36 | 30.05254 | 1002.445 | 124.2873 | 36 | 28.29405 | 943.7878 | 117.0147 |
| 37 | 29.5942  | 987.1562 | 122.3917 | 37 | 28.05183 | 935.7082 | 116.013  |
| 38 | 28.68699 | 956.8951 | 118.6398 | 38 | 27.94284 | 932.0727 | 115.5622 |
| 39 | 27.94027 | 931.987  | 115.5516 | 39 | 27.303   | 910.73   | 112.9161 |
| 40 | 27.22433 | 908.1059 | 112.5907 | 40 | 26.1164  | 871.1492 | 108.0087 |
| 41 | 26.90847 | 897.57   | 111.2845 | 41 | 19.95188 | 665.5232 | 82.51432 |
| 42 | 25.49099 | 850.2879 | 105.4222 | 42 | 18.74735 | 625.3442 | 77.53277 |
| 43 | 18.83373 | 628.2256 | 77.89002 | 43 | 18.27991 | 609.7522 | 75.59961 |
| 44 | 18.11916 | 604.39   | 74.93478 | 44 | 17.286   | 576.5988 | 71.48911 |
| 45 | 17.39385 | 580.1964 | 71.93515 | 45 | 15.98043 | 533.0499 | 66.08974 |
| 46 | 17.22004 | 574.3987 | 71.21633 | 46 | 15.1746  | 506.17   | 62.75706 |
| 47 | 16.04365 | 535.1586 | 66.35118 | 47 | 14.88786 | 496.6054 | 61.57119 |
| 48 | 14.99904 | 500.3142 | 62.03103 | 48 | 13.86611 | 462.5235 | 57.34558 |
| 49 | 13.73022 | 457.9908 | 56.78359 | 49 | 12.47623 | 416.1621 | 51.5975  |
| 50 | 9.846472 | 328.4429 | 40.72172 | 50 | 8.252623 | 275.2779 | 34.13009 |
| 51 | 7.755985 | 258.7118 | 32.07616 | 51 | 8.011535 | 267.2361 | 33.13303 |
| 52 | 7.033157 | 234.6009 | 29.08679 | 52 | 6.978933 | 232.7921 | 28.86254 |
